# Supplementary material for: Utility of the methylated SEPT9 test for the early detection of colorectal cancer: a systematic review and meta-analysis of diagnostic test accuracy
Source: PubMed Central journal article supplement — BMJ Open Gastroenterol. 2020 Feb 18;7(1):e000355. doi: 10.1136/bmjgast-2019-000355 (PMC7039590; doi:10.1136/bmjgast-2019-000355), 2020-02-18
Supplement: bmjgast-2019-000355supp002.pdf [file bmjgast-2019-000355supp002.pdf]

**Supplementary Section**

Supplementary Tables and Legends

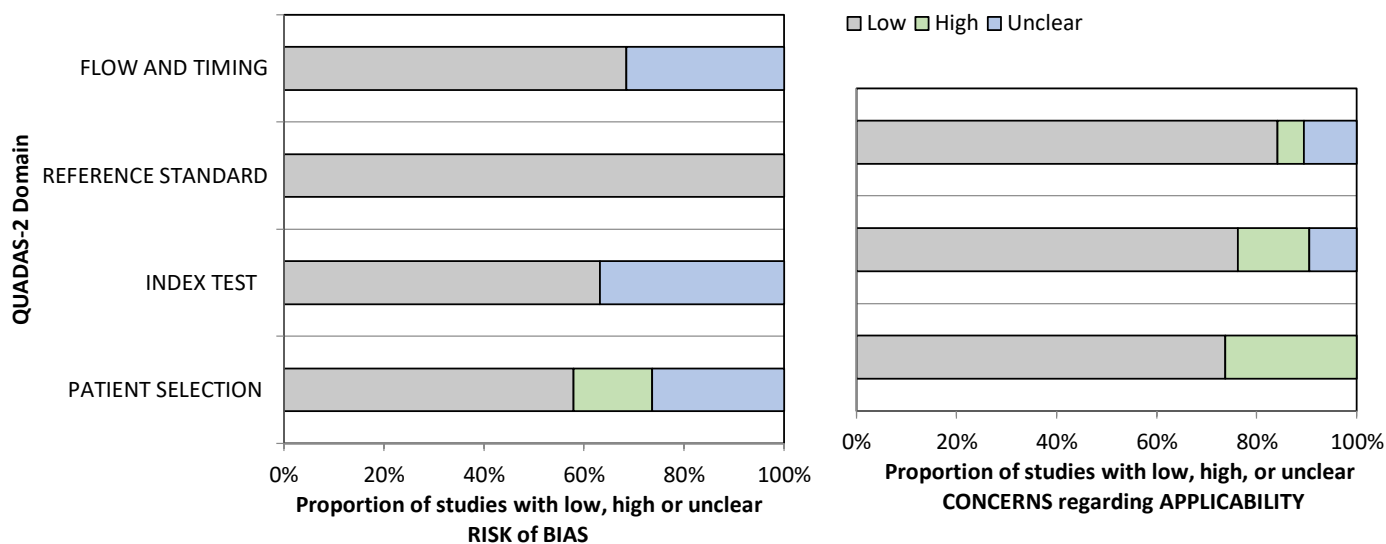

|                   | Risk of Bias      |            |                    |               | Applicability Concerns |            |                    |
|-------------------|-------------------|------------|--------------------|---------------|------------------------|------------|--------------------|
|                   | PATIENT SELECTION | INDEX TEST | REFERENCE STANDARD | F- AND TIMING | PATIENT SELECTION      | INDEX TEST | REFERENCE STANDARD |
| Grutzmann et al.  | -                 | -          | -                  | -             | -                      | -          | -                  |
| Lofton-Day et al. | ?                 | ?          | -                  | -             | +                      | -          | -                  |
| deVos et al.      | -                 | -          | -                  | -             | -                      | -          | -                  |
| Tanzer et al.     | ?                 | ?          | -                  | -             | -                      | -          | -                  |
| Ahlquist et al.   | +                 | -          | -                  | ?             | -                      | -          | -                  |
| Toth et al.       | ?                 | -          | -                  | -             | -                      | -          | -                  |
| Lee et al.        | ?                 | ?          | -                  | -             | +                      | -          | -                  |
| Liu et al.        | +                 | ?          | -                  | -             | -                      | -          | -                  |
| Chruch et al.     | -                 | -          | -                  | -             | -                      | -          | -                  |
| Johnson et al     | -                 | ?          | -                  | -             | -                      | -          | -                  |
| Potter et al.     | -                 | -          | -                  | -             | -                      | -          | -                  |
| Su et al          | -                 | ?          | -                  | ?             | +                      | +          | -                  |
| Toth et al.       | ?                 | ?          | -                  | ?             | +                      | +          | +                  |
| Jin et al         | -                 | -          | -                  | -             | -                      | -          | -                  |
| Orntoft et al.    | +                 | -          | -                  | -             | +                      | -          | ?                  |
| Wu et al.         | -                 | -          | -                  | -             | -                      | -          | -                  |
| Song et al.       | -                 | -          | -                  | ?             | -                      | +          | -                  |
| Song et al.       | -                 | -          | -                  | ?             | -                      | -          | -                  |
| Chen et. al       | -                 | -          | -                  | ?             | -                      | -          | ?                  |

(+) High (?) Unclear (-) Low

**Supplementary Table 1/Figure 1: Results of quality assessment of studies (QUADAS)**

|                       | Spearman coefficient | p-value | Threshold Effects | Non-threshold effects |
|-----------------------|----------------------|---------|-------------------|-----------------------|
| Overall               | 0.192                | 0.4     | No                | Yes                   |
| Region of recruitment |                      |         |                   |                       |
| Asia                  | 0.793                | 0.02    | Yes               | No                    |
| Europe                | -0.47                | 0.42    | No                | Yes                   |
| North America         | -0.08                | 0.9     | No                | Yes                   |
| Sample Size           |                      |         |                   |                       |
| <100                  | 0.21                 | 0.6     | No                | Yes                   |
| >100                  | 0.11                 | 0.8     | No                | Yes                   |
| Threshold Level       |                      |         |                   |                       |
| 1/3 algorithm         | 0.08                 | 0.83    | No                | Yes                   |
| 2/3 algorithm         | 0.50                 | 0.21    | No                | Yes                   |

**Supplementary Table 2:** Spearman Correlation co-efficient of sources of heterogeneity (I<sub>2</sub>) in meta-analysis results.

| Co-variate     | Category | Number of Studies | Sensitivity (95% CI) | p-value | Specificity (95% CI) | p-values |
|----------------|----------|-------------------|----------------------|---------|----------------------|----------|
| Asian          | Yes      | 8                 | 0.69 [0.59 - 0.79]   | 0.08    | 0.95 [0.93 - 0.98]   | <0.001   |
|                | No       | 11                | 0.69 [0.60 - 0.77]   |         | 0.90 [0.86 - 0.94]   |          |
| European       | Yes      | 5                 | 0.71 [0.59 - 0.83]   | 0.22    | 0.96 [0.92 - 0.99]   | 0.07     |
|                | No       | 14                | 0.68 [0.60 - 0.75]   |         | 0.91 [0.88 - 0.95]   |          |
| North American | Yes      | 6                 | 0.66 [0.55 - 0.78]   | 0.06    | 0.85 [0.80 - 0.90]   | <0.001   |
|                | No       | 13                | 0.70 [0.64 - 0.80]   |         | 0.96 [0.94 - 0.97]   |          |
| Sample Size    | <100     | 9                 | 0.64 [0.54 - 0.74]   | 0.01    | 0.90 [0.85 - 0.95]   | <0.001   |
|                | 100+     | 10                | 0.72 [0.64 - 0.80]   |         | 0.94 [0.91 - 0.97]   |          |
| Stage          | I        | 12                | 0.67 [0.59 - 0.74]   | 0.06    | 0.93 [0.90 - 0.96]   | 0.13     |
|                | IV       | 4                 | 0.71 [0.58 - 0.83]   |         | 0.89 [0.80 - 0.97]   |          |

**Supplementary Table 3:** Results of Subgroup meta-regression with country of recruitment, CRC case sample size, and recruiting more Stage 1 over Stage 4 as covariates. Significant p-values represent the effect of covariate on the pooled sensitivity and specificity.

Supplementary Figures

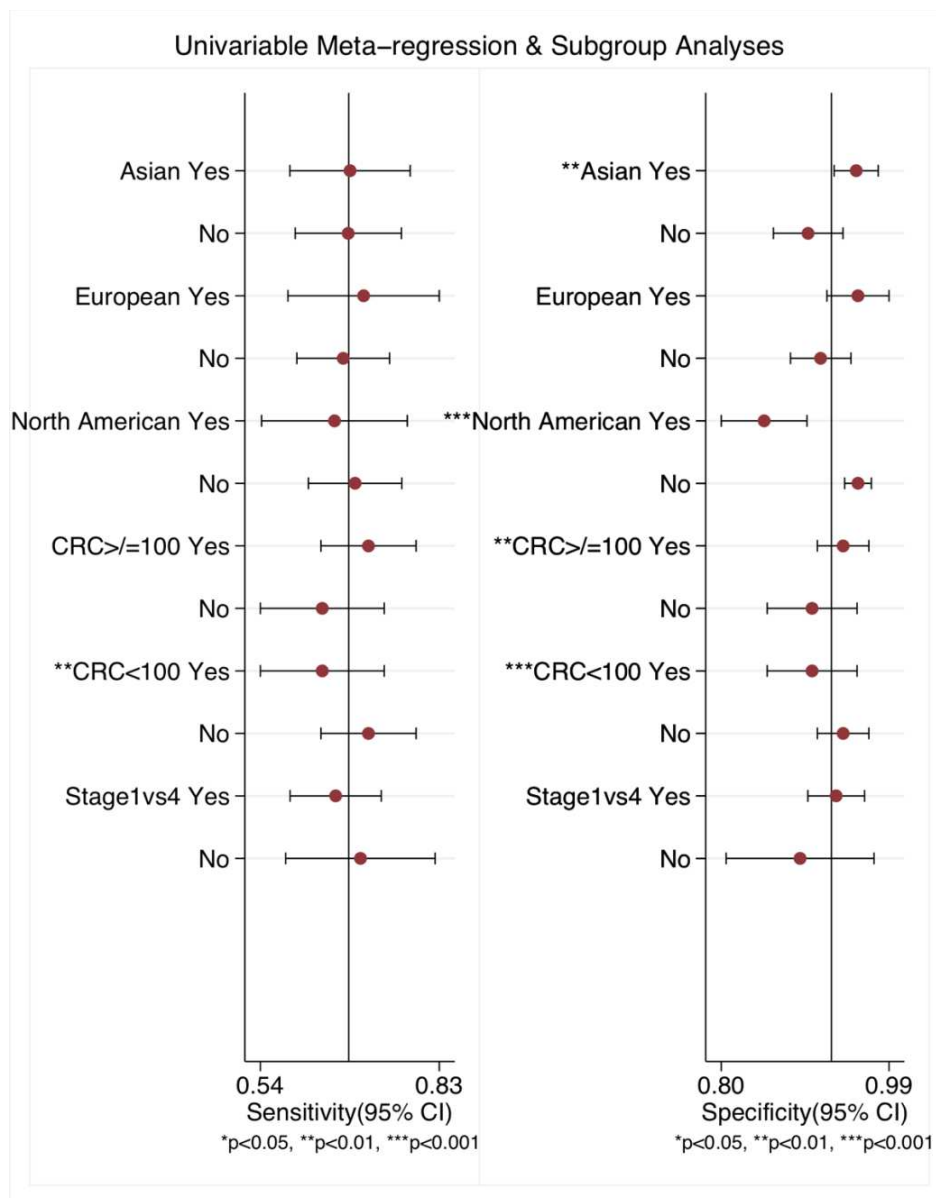

Supplementary Figure 2: Subgroup meta-regression forest plot with confidence intervals.

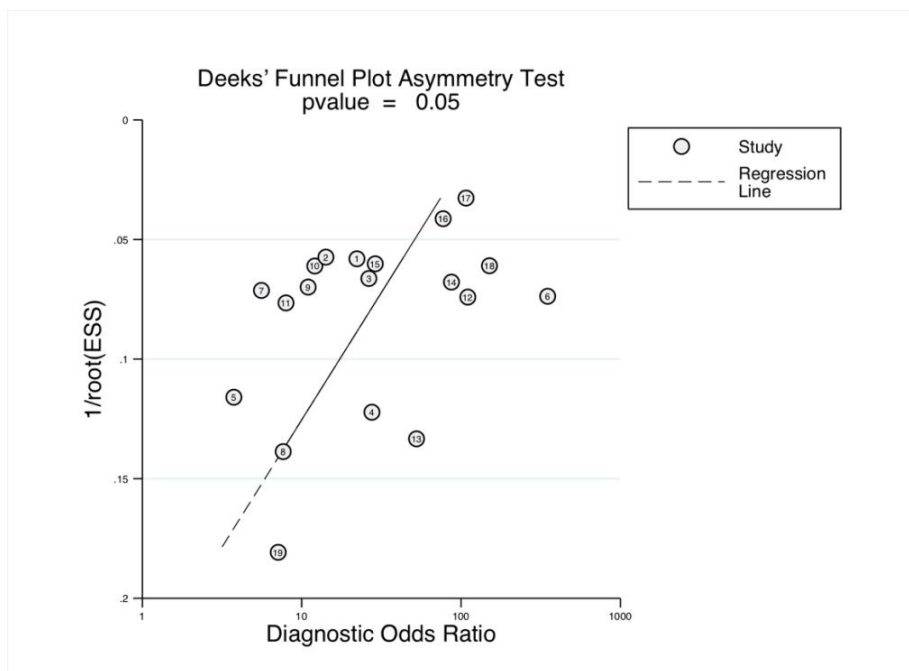

**Supplementary Figure 3:** Deek's Funnel Plot - Study points and regression line generated by Deek's asymmetry test to assess publication bias.

**Supplementary Figure 4:**

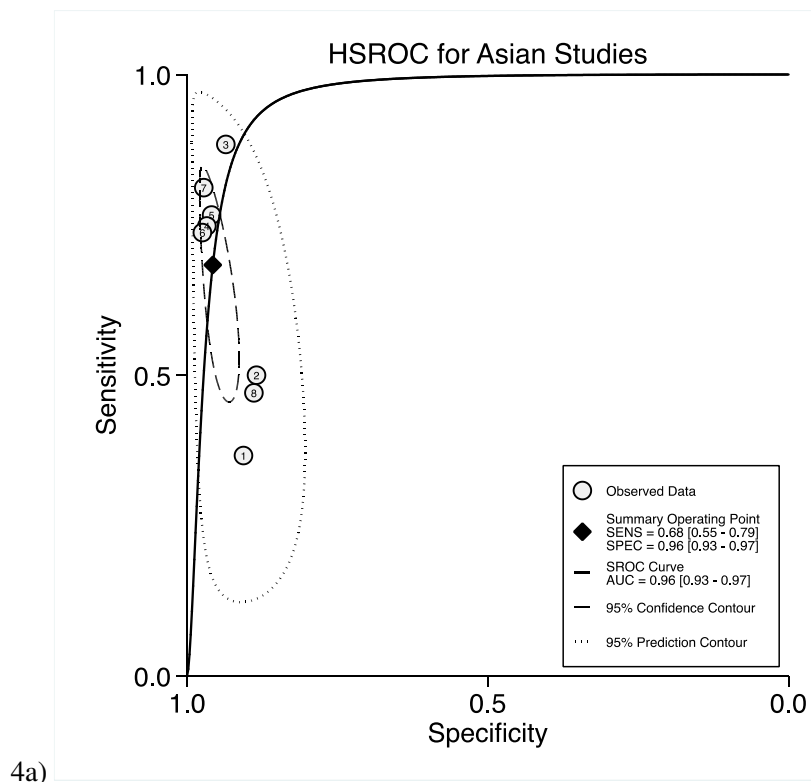

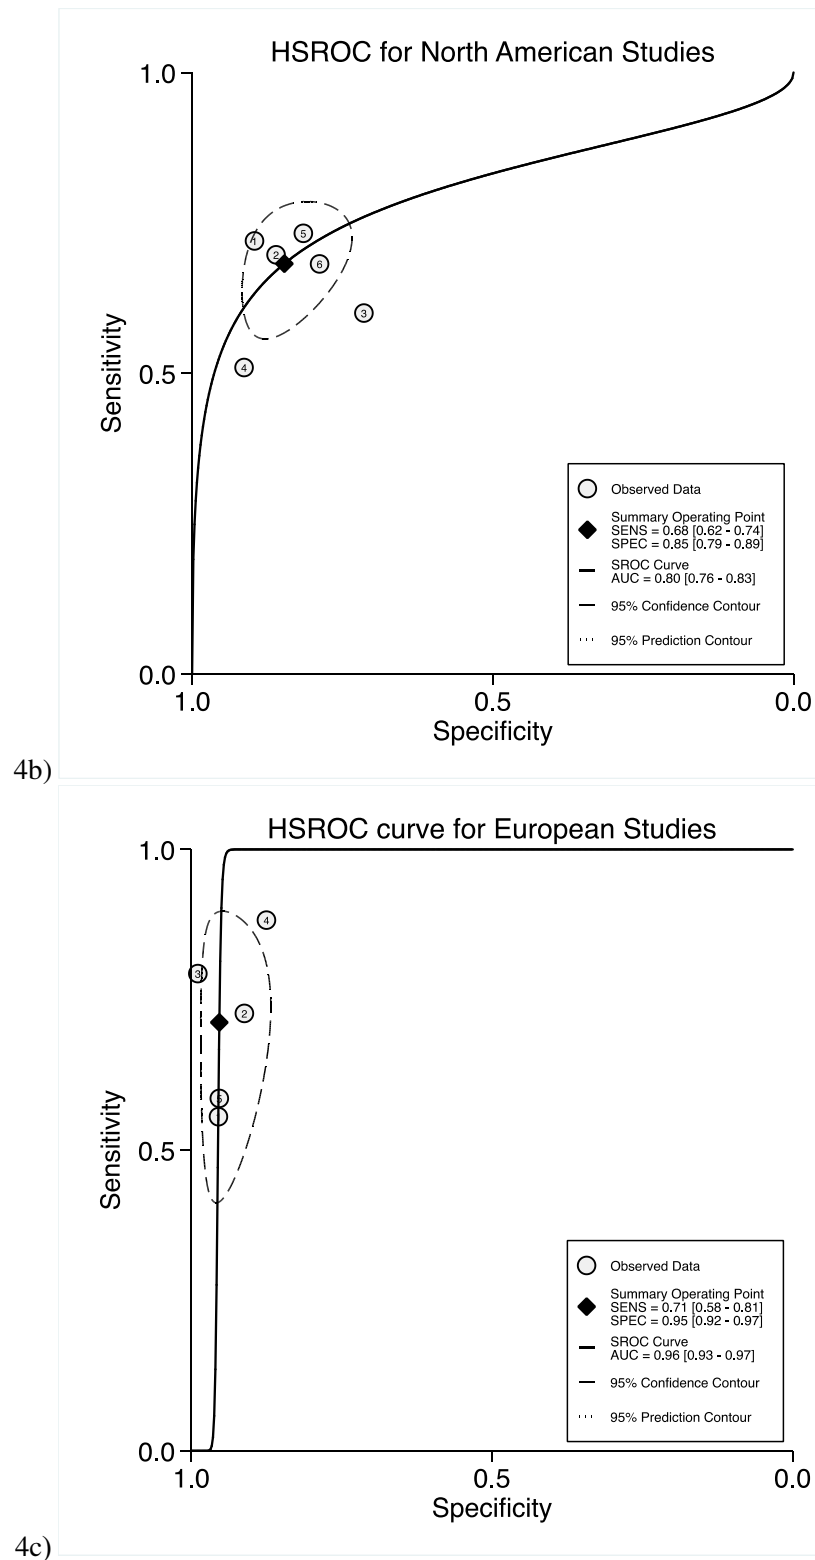

**Supplementary Figure 4:** a) HSROC plot for Asian studies b) HSROC plot for North American studies c) HSROC plot for European studies.

Supplementary Figure 5:

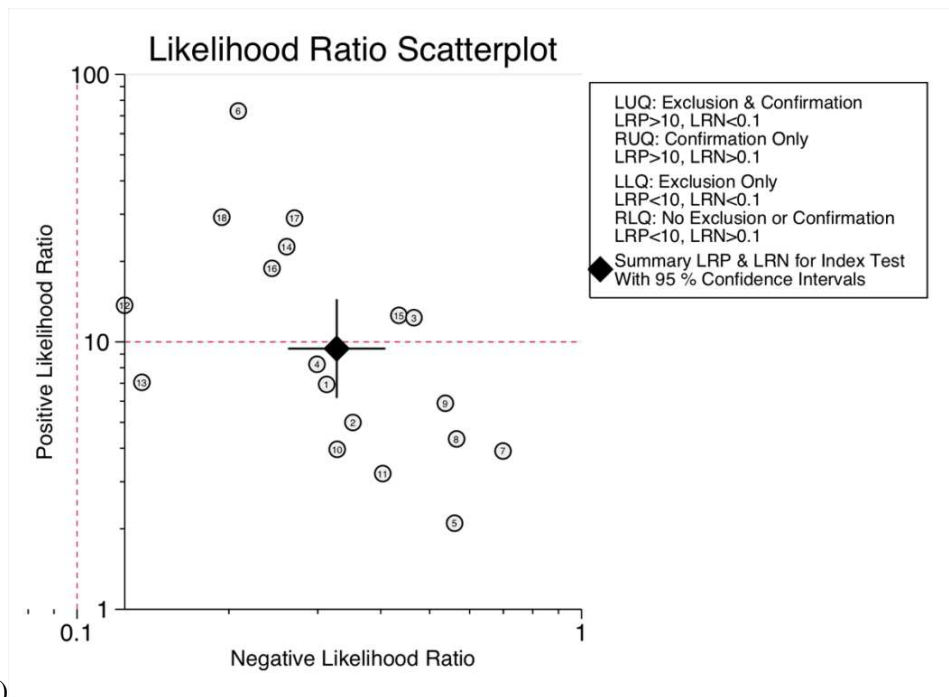

5a)

**Supplementary Figure 5a:** Likelihood scattergram, individual points are studies, with the summary point and 95% confidence intervals.

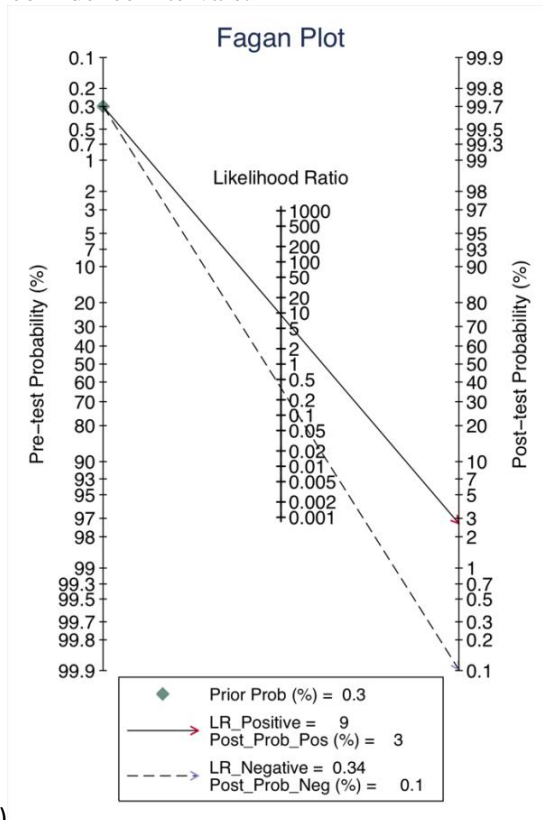

5b)

**Supplementary Figure 5b:** Fagan's plot for pre-test and post-probabilities with likelihood ratios. This example uses a pre-test probability of 0.3% (Average CRC risk) to illustrate the test efficiency. This plot visually summarises the effect of the pre-test probability and likelihood ratio to the post-test probability. For a test to be clinically valid, the dotted line must always lie below the solid line on the right side.

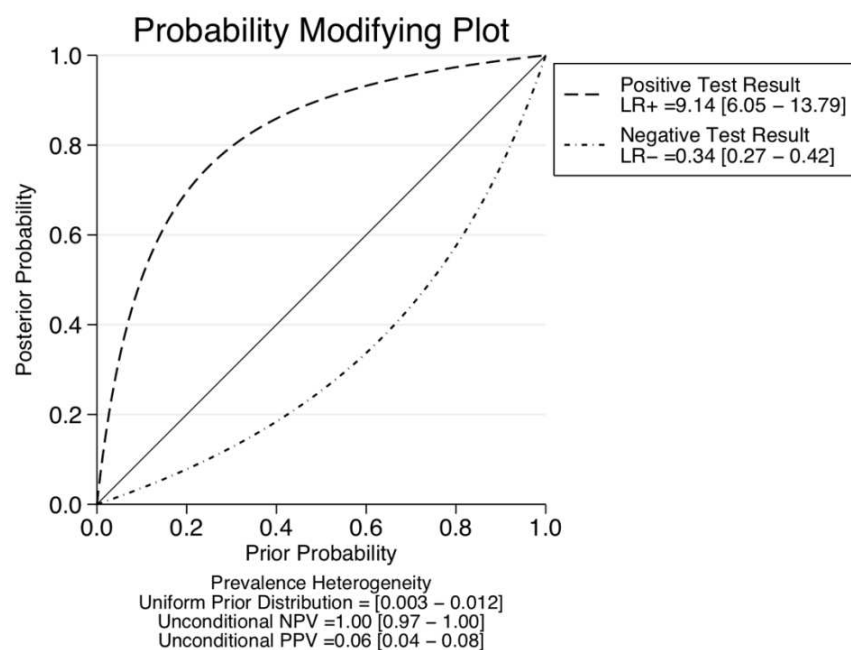

5c)

**Supplementary Figure 5c:** Probability modifying graph which takes into account CRC prevalence depicting change in post-test probability for a range of pre-test probabilities from 0.3% (Average CRC risk) to 1.2% (Elevated CRC risk).
